# Supplementary material for: trans-Cleavage of the CRISPR-Cas12a-aptamer system for one-step antigen detection
Source: Royal Society of Chemistry journal article supplement (doi:10.1039/d3cc04532c), 2023-01-01
Supplement: d3cc04532c1.pdf [file d3cc04532c1.pdf]

## **Trans-Cleavage of CRISPR-Cas12a-Aptamer System for One-Step Antigen Detection**

Hongxuan Fan, Shi-Hua Luo, Ying Zhu, Jiye Shi, Fangfei Yin\*, Jiang Li\*

## Supporting Information

### Table of Contents

|                 |               |           |
|-----------------|---------------|-----------|
| 1.              | Experiments   |           |
| Procedures..... |               |           |
| ..... 3-4       |               |           |
| 2.              | Supplementary | Figures   |
| .....           |               | 5-14      |
| 3.              | Supplementary | Tables    |
| .....           |               | 15-16     |
| 4.              |               | Reference |
| .....           |               |           |
| ..... 17        |               |           |

## **1. Experiments Procedures**

### **1.1 Regents**

All DNA and RNA oligonucleotides used in this research were synthesized by Sangon Biotechnology Inc. (Shanghai, China). The sequence was shown in Table S1. The diethylpyrocarbonate (DEPC)-treated water, RNase inhibitor, prostate-specific antigen (PSA) ELISA Kit were purchase from Sangon Biotechnology Inc. (Shanghai, China). The Cas12a and buffer were purchase from New England Biolabs (Beijing) Ltd. (Beijing, China). Clinical samples were provided by Renji Hospital (Shanghai, China). The regents were all chromatography grade or analytical grade and used as received. The solutions were prepared using the deionized water purified through a Millipore system (18.2 MΩ cm).

### **1.2 Fluorescence measurements for cleavage kinetics study**

For the trans cleavage kinetics study, the aptamer (50 nM) with protein target as experimental group or the buffer only as the control group was added to the well plate coated with capture antibody and incubated with 1.0 h. The Cas 12a-crRNA complexes were assembly by incubated with the 250 nM Cas12a and 250 nM crRNA for 30 min at 37 °C. The fluorescence intensity (510 nm) was measured at excitation wavelength of 480 nm using a FluoroMax-4 spectrofluorometer (Horiba Scientific) for every 5 min.

### **1.3 Fluorescence measurements for establishment of titration curves**

For the establishment of titration curves, the protein targets with concentration from 0.16 ng/mL to 10 ng/mL were added to the to the well plate coated with capture antibody and incubated with 1.5 h. The follow steps were same as 1.2. And we defined signal change as:

$$\text{Signal Change} = \text{Fluorescent (Blank)} - \text{Fluorescent (target)}$$

### **1.4 Fluorescence measurements for clinical samples**

The clinical samples1, 2 and 4 were diluted 3-fold with PB buffer to be used. The follow steps were same as 1.2 and 1.3.

### **1.5 ELISA assay for protein detection**

The workflow of ELISA detection assay was provided by Sangon Biotechnology Inc. (Shanghai, China).

Websites:

<https://cdn1.sinobiological.com/reagent/KIT002.pdf>

## 2. Supplementary Figures

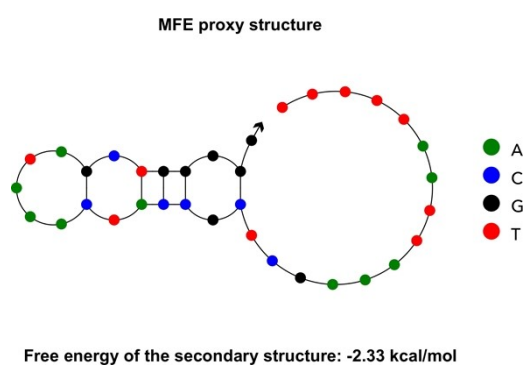

**Fig. S1.** The minimum free energy (MFE) proxy structure of PSA aptamer provided by NUPACK.

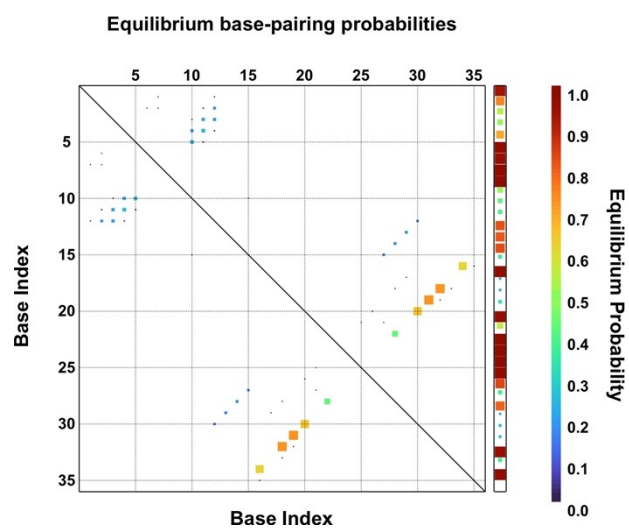

**Fig. S2.** The equilibrium base-pairing probabilities of PSA aptamer provided by NUPACK.

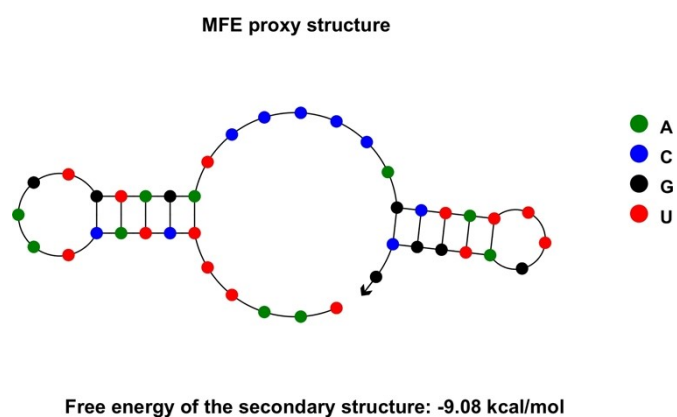

**Fig. S3.** The minimum free energy proxy structure of crRNA provided by NUPACK.

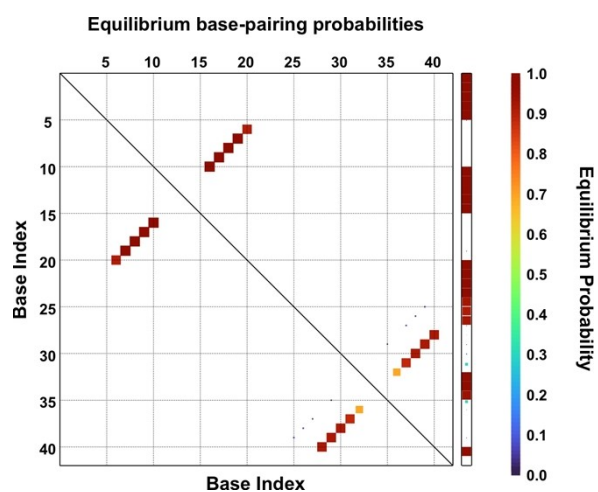

**Fig. S4.** The equilibrium base-pairing probabilities of crRNA provided by NUPACK.

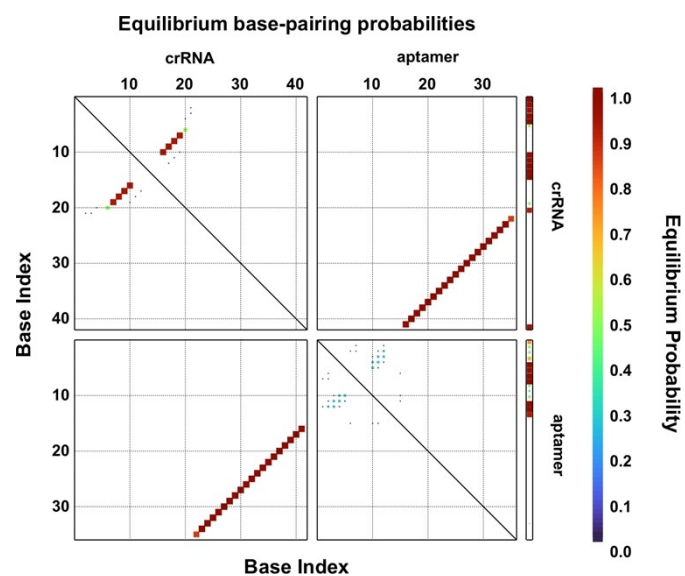

**Fig. S5.** The equilibrium base-pairing probabilities between crRNA and PSA aptamer provided by NUPACK.

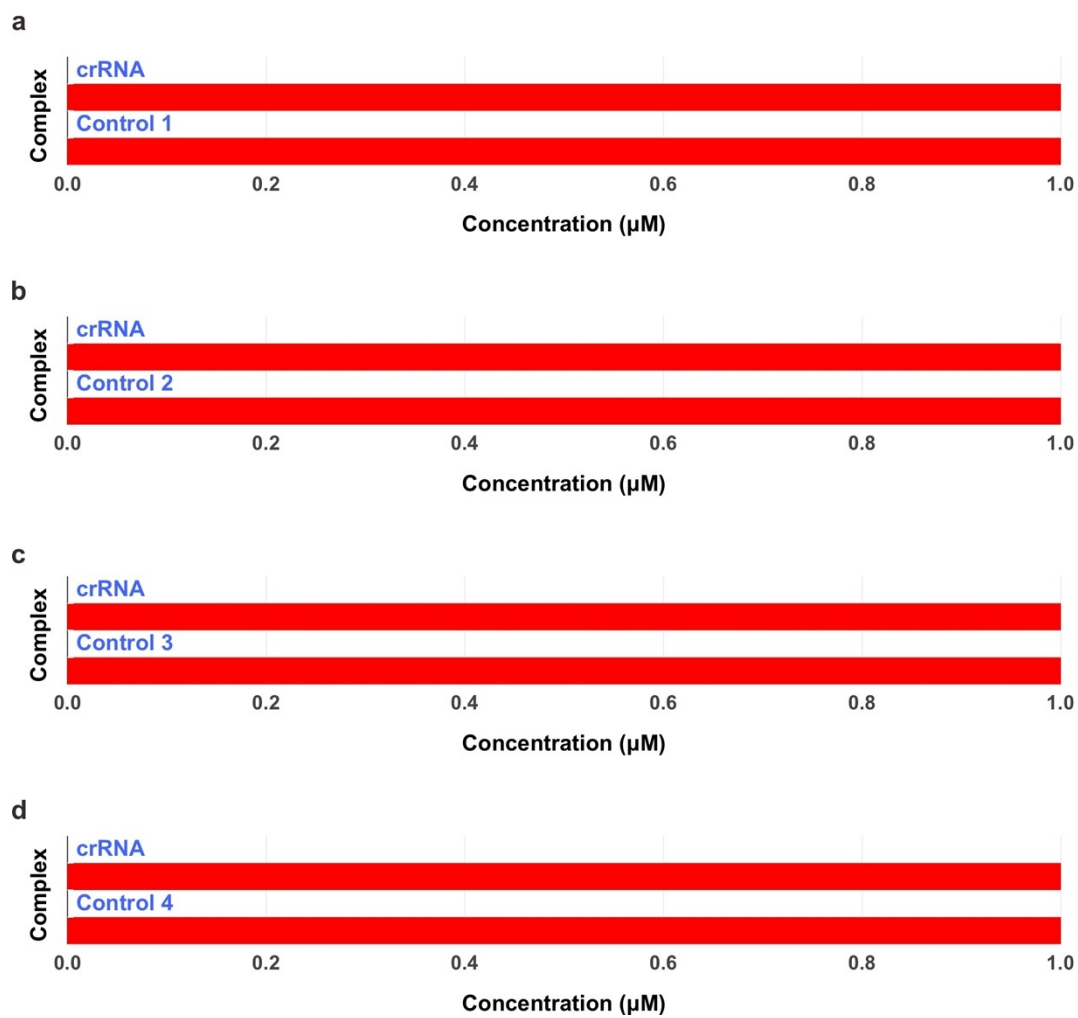

**Fig. S6.** The equilibrium complex concentration of mixture of crRNA and control 1, control 2, control 3 and control 4 provided by NUPACK.

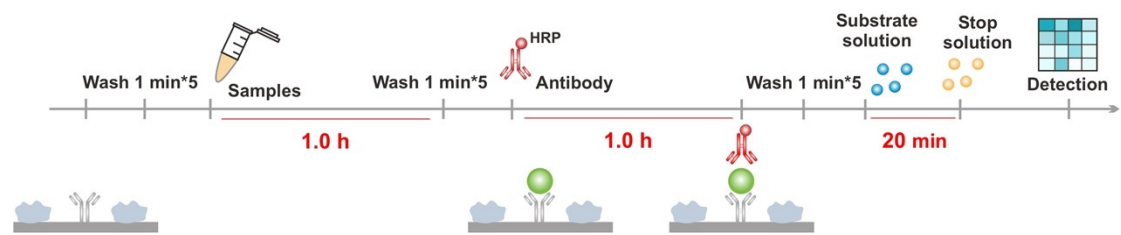

**Fig. S7.** The workflow of ELISA detection assay.

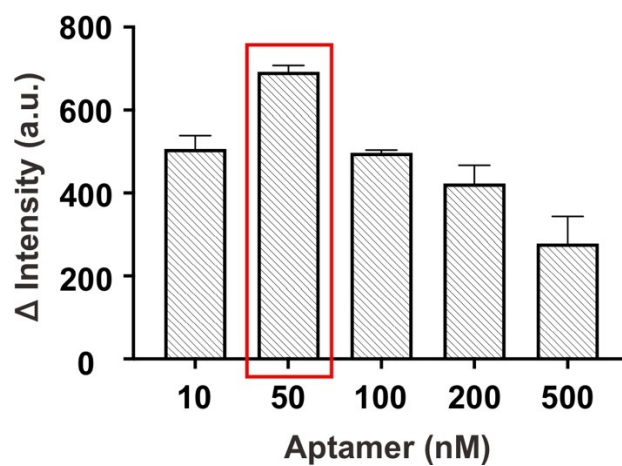

**Fig. S8.** Effect of aptamer concentration on signal response. When the aptamer concentration was 50 nM, the signal change was maximum. The PSA concentration was constantly 10 ng/mL. Error bars, mean  $\pm$  s.d. (n = 3).

### 3. Supplementary Tables

**Table S1** DNA sequence used in the experiment

| Sequence name | Sequence (5'-3')                    |
|---------------|-------------------------------------|
| crRNA-PSA     | UAAUUUCUACUAAGUGUAGAUCUUUUUAGGCG    |
| PSA-aptamer   | TTTTTAATTAAAGCTCGCCATCAAATAGCTGGGGG |
| Signal-probe  | BHQ1-CCACCACCACCA-FAM               |
| Control-1     | GTGGCAGGTCAGTCATGTATACTGCACTAATTC   |
| Control-2     | TAGTGCAGTATACATGACTGACCTGCCACGTCA   |
| Control-3     | TATCACCAGGCAGTTGACAGTGTAGCAAGCTGT   |
| Control-4     | TCAACTGCCTGGTGATAAAACGACACTACGTGG   |

**Table S2** Comparison of different methods for the detection of PSA<sup>1-6</sup>.

| Method           | Time-cost | Total steps | Pretreatment | Complex Equipment |
|------------------|-----------|-------------|--------------|-------------------|
| This work        | 1.5 h     | 1 step      | No           | No                |
| Radioimmunoassay | 10.75 h   | 3 steps     | Yes          | Yes               |
| ELISA            | 1.75 h    | 7 steps     | No           | No                |
| SPR              | 0.5 h     | 4 steps     | Yes          | Yes               |
| ECL              | 1 h       | 4 steps     | Yes          | No                |
| SERS             | 1 h       | 2 steps     | Yes          | Yes               |
| Electrochemistry | 4 h       | 4 steps     | Yes          | No                |

\*ELISA: enzyme-linked immunosorbent assay

\*SPR: surface plasmon resonance

\*ECL: electrochemiluminescence

\*SERS: surface-enhanced Raman scattering

**Table S3** Comparison of the performance of our method with ELISA method.

| Method    | Time-cost | Total steps | LOD        | Work range    |
|-----------|-----------|-------------|------------|---------------|
| This work | 1.5 h     | 1 step      | 0.16 ng/mL | 0.31-5 ng/mL  |
| ELISA     | 1.75 h    | 7 steps     | 0.19 ng/mL | 0.31-20 ng/mL |

\*The ELISA kit and data was provided by Sangon Biotechnology Inc.

([https://store.sangon.com/productImage/DOC/D711048/D711048\\_ZH\\_P.pdf](https://store.sangon.com/productImage/DOC/D711048/D711048_ZH_P.pdf)).

**Table S4** The source data of clinical samples detection.

| ID      | Parallel 1 | Parallel 2 | Parallel 3 | AVER. | $\Delta$ | Log C | C    |
|---------|------------|------------|------------|-------|----------|-------|------|
| 1       | 996        | 903        | 1002       | 967   | 620      | 1.68  | 3.20 |
| 2       | 1109       | 989        | 1106       | 1068  | 1109     | 0.91  | 1.88 |
| 3       | 1089       | 997        | 917        | 1001  | 586      | 1.42  | 2.68 |
| 4       | 1072       | 998        | 894        | 988   | 1072     | 1.52  | 2.86 |
| 5       | 987        | 896        | 991        | 958   | 629      | 1.75  | 3.36 |
| 6       | 1579       | 1439       | 1449       | 1489  | 98       | -2.29 | 0.21 |
| 7       | 1406       | 1369       | 1415       | 1397  | 190      | -1.59 | 0.33 |
| 8       | 1379       | 1398       | 1375       | 1384  | 203      | -1.49 | 0.36 |
| 9       | 1367       | 1329       | 1408       | 1368  | 219      | -1.37 | 0.39 |
| 10      | 1140       | 1089       | 1083       | 1104  | 483      | 0.64  | 1.56 |
| Control | 1607       | 1573       | 1581       | 1587  | /        | /     | /    |

\*AVER.: The average results of three parallel experiments.

\* $\Delta$ : = *Fluorescence (Control) – Fluorescence (AVER.)*

\*Log C: *log concentration*

\*C: The concentration of PSA on the clinical samples.

\*Unit:

Parallel 1 /Parallel 2/Parallel 3/AVER.: a.u.

Log C: log ng/mL

C: ng/mL

#### 4. Reference

1. J. Breault-Turcot, H. P. Poirier-Richard, M. Couture, D. Pelechacz and J. F. Masson, *Lab Chip*, 2015, **15**, 4433-4440.
2. K. Chuah, L. M. Lai, I. Y. Goon, S. G. Parker, R. Amal and J. Justin Gooding, *Chem. Commun.*, 2012, **48**, 3503-3505.
3. R. Gao, Z. Cheng, A. J. deMello and J. Choo, *Lab Chip*, 2016, **16**, 1022-1029.
4. H. Harma, T. Soukka, S. Lonnberg, J. Paukkunen, P. Tarkkinen and T. Lovgren, *Luminescence*, 2000, **15**, 351-355.
5. A. Liu, F. Zhao, Y. Zhao, L. Shangguan and S. Liu, *Biosens. Bioelectron.*, 2016, **81**, 97-102.
6. H. C. B. Graves, N. Wehner and T. A. Stamey, *Clin. Chem.* 1992, **38**, 735-742.
